# Supplementary material
Source: MDPI journal article supplement (https://www.mdpi.com/2073-4344/14/5/330)
Supplement: s1 [file s1 › Figure S1.pdf]

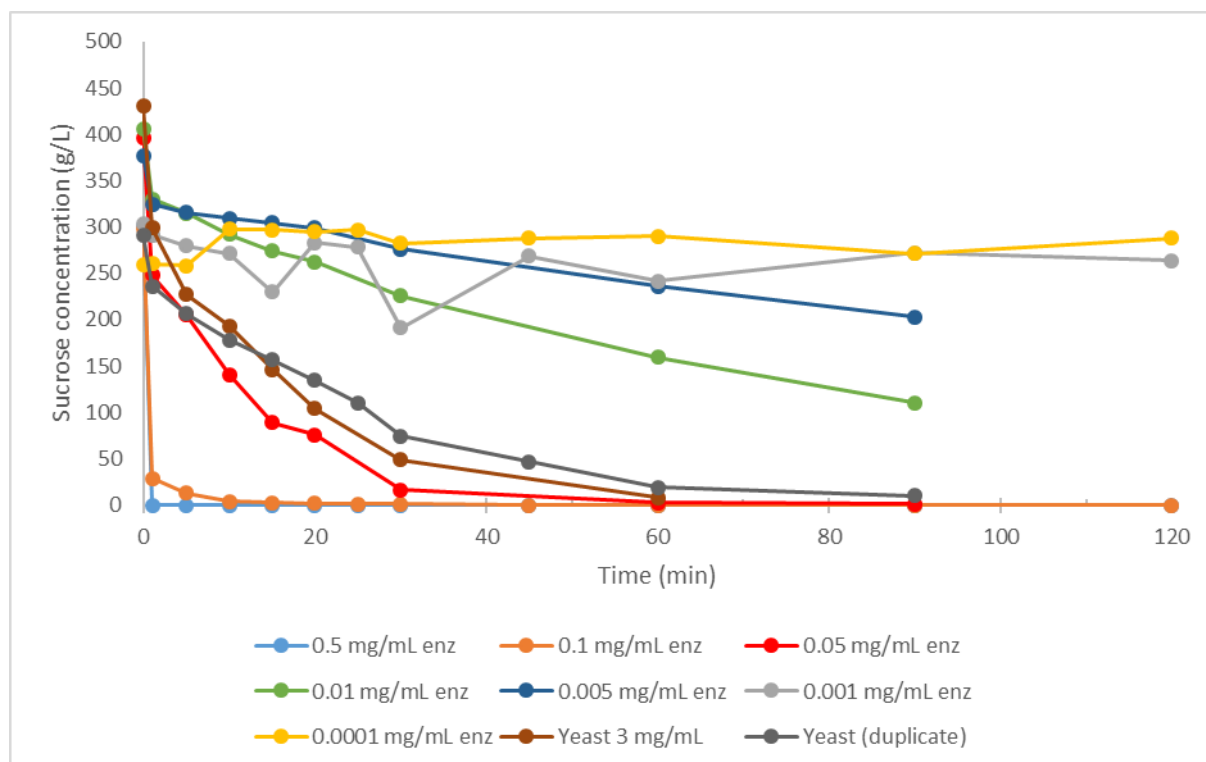

**Figure S1.** Determination of suitable dose of pure invertase corresponding to 3 mg/mL of Baker's Yeast. 0.05 mg/mL of invertase appears to be similar to the hydrolysis rate of using yeast cells.
