# Supplementary material
Source: MDPI journal article supplement (https://www.mdpi.com/2073-4344/14/5/330)
Supplement: s1 [file s1 › Figure S2.pdf]

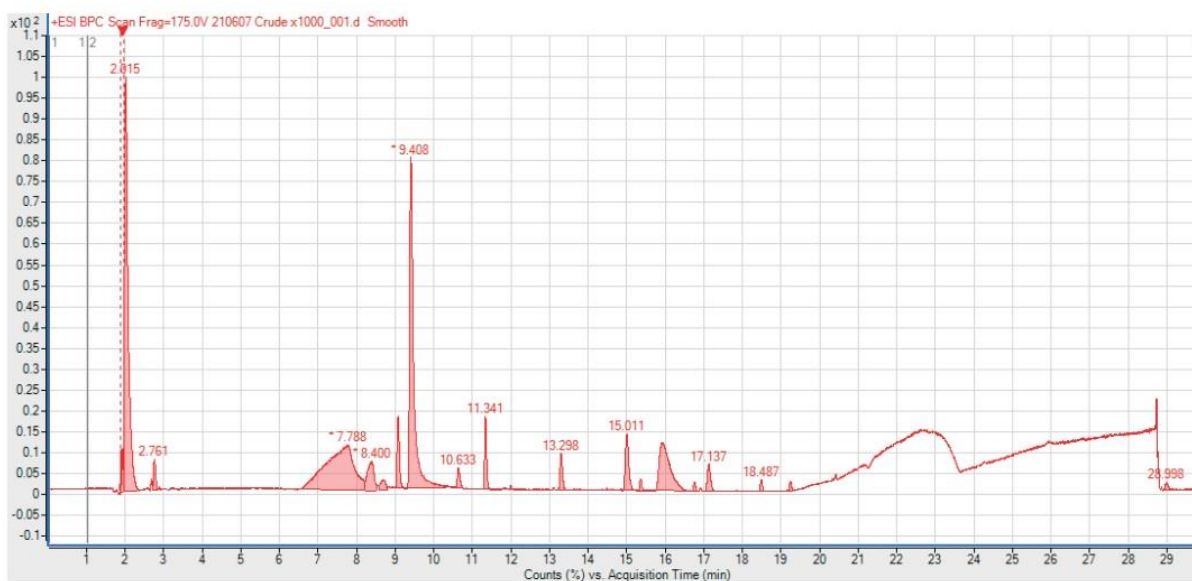

**Figure S2.** The LC chromatogram from the LC-MS analysis, where the highest peak eluting at 2.015 min corresponds to betaine.
