# Supplementary material
Source: MDPI journal article supplement (https://www.mdpi.com/2073-4344/14/5/330)
Supplement: s1 [file s1 › Figure S3.pdf]

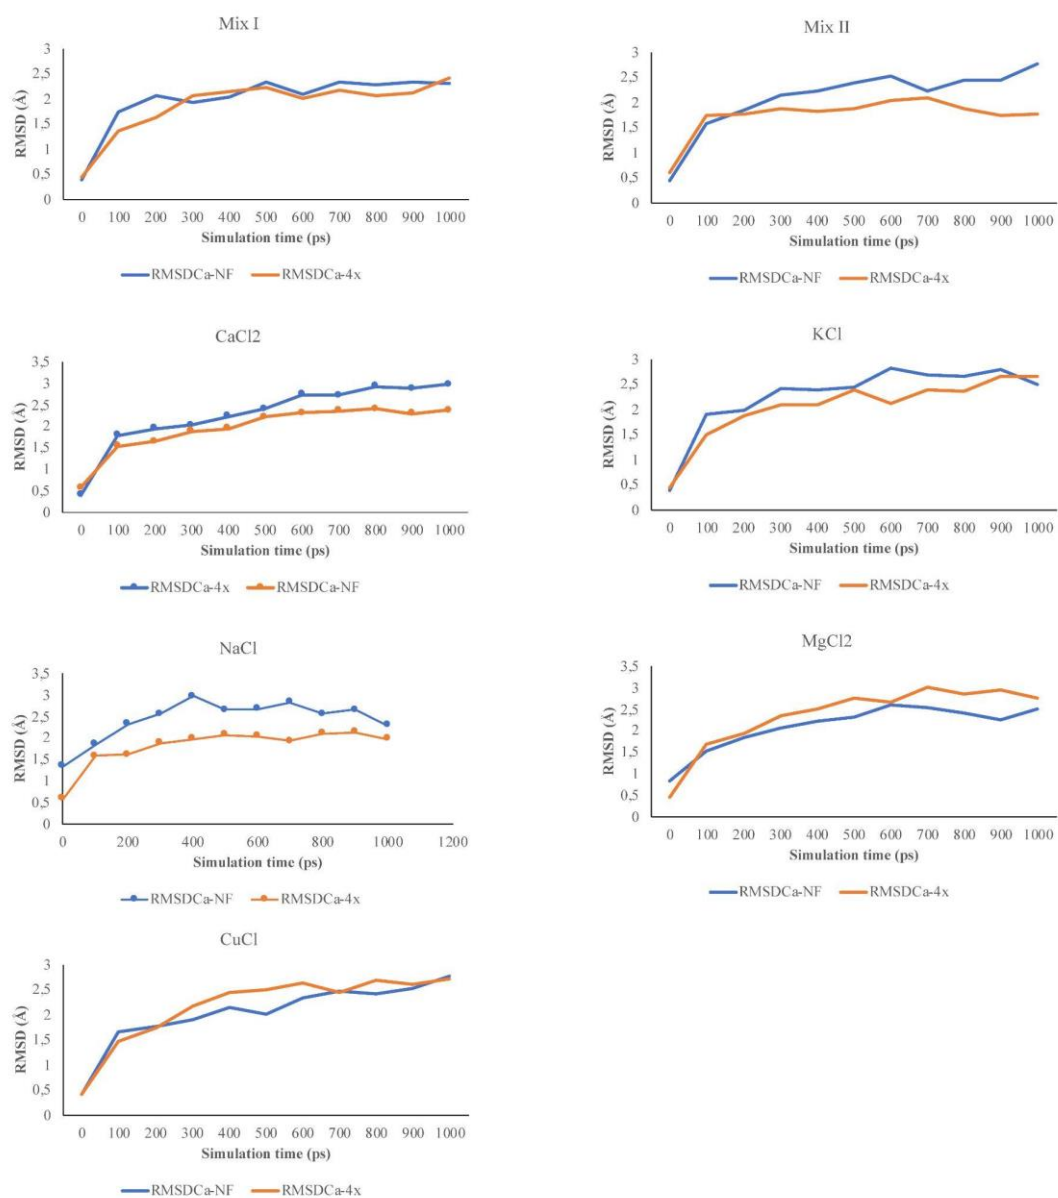

**Figure S3.** Root mean square deviation of the octamer structure with different salts and their different concentrations.
