# Supplementary material
Source: MDPI journal article supplement (https://www.mdpi.com/2073-4344/14/5/330)
Supplement: s1 [file s1 › Figure S4.pdf]

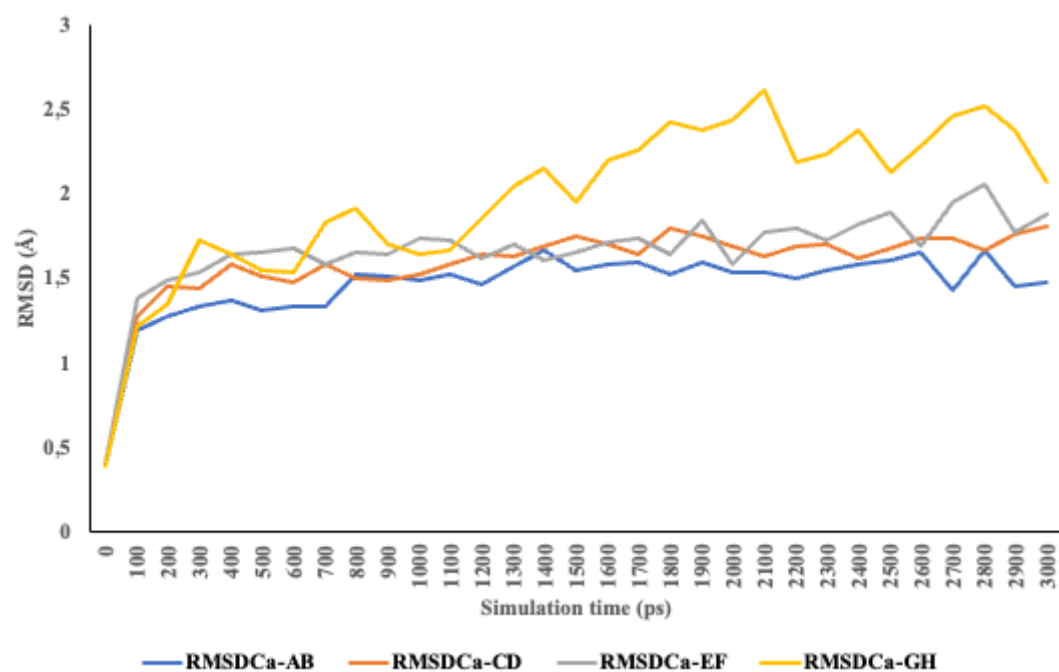

**Figure S4.** Root mean square deviation of the four subunits after MD-simulation for 3 ns before docking experiments.
